# Supplementary material for: Synergetic co-immobilization of SeO42−and Sr2+from aqueous solution onto multifunctional graphene oxide and carbon-dot based layered double hydroxide nanocomposites and their mechanistic investigation
Source: Royal Society of Chemistry journal article supplement (doi:10.1039/c8ta01605d), 2018-01-01
Supplement: c8ta01605d1.pdf [file c8ta01605d1.pdf]

## ***Electronic Supplementary Information***

### **Synergetic co-immobilization of $\text{SeO}_4^{2-}$ and $\text{Sr}^{2+}$ from aqueous solution onto multifunctional graphene oxide and carbon-dot based layered double hydroxide nanocomposites and their mechanistic investigation**

**Paulmanickam Koilraj, Yuta Kamura, Keiko Sasaki\***

*Department of Earth Resources Engineering, Faculty of Engineering, Kyushu University, 744  
Motooka, Fukuoka 819-0395, Japan*

---

\*Corresponding Author

Prof. Dr. Keiko Sasaki

Department of Earth Resources Engineering

Faculty of Engineering

Kyushu University

744 Motooka

Fukuoka 819-0395

Japan

Tel./Fax. +81 92 802 3338

Email: [keikos@mine.kyushu-u.ac.jp](mailto:keikos@mine.kyushu-u.ac.jp)

#### **Author Information**

Paulmanickam Koilraj - [koilraj@gmail.com](mailto:koilraj@gmail.com); [koilraj@mine.kyushu-u.ac.jp](mailto:koilraj@mine.kyushu-u.ac.jp)

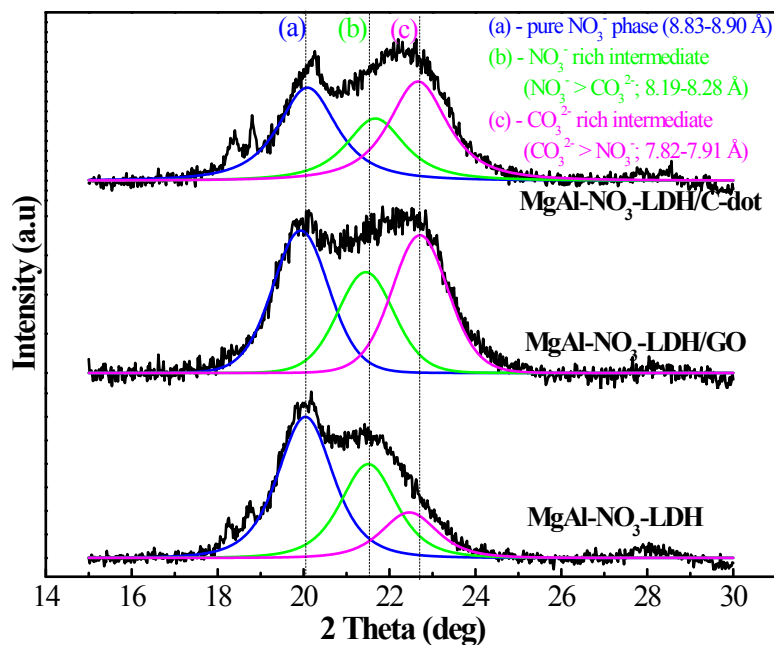

**Figure S1.** PXRD peak fitting of as-synthesized MgAl-NO<sub>3</sub>-LDH, MgAl-NO<sub>3</sub>-LDH/GO and MgAl-NO<sub>3</sub>-LDH/C-dot nanocomposites.

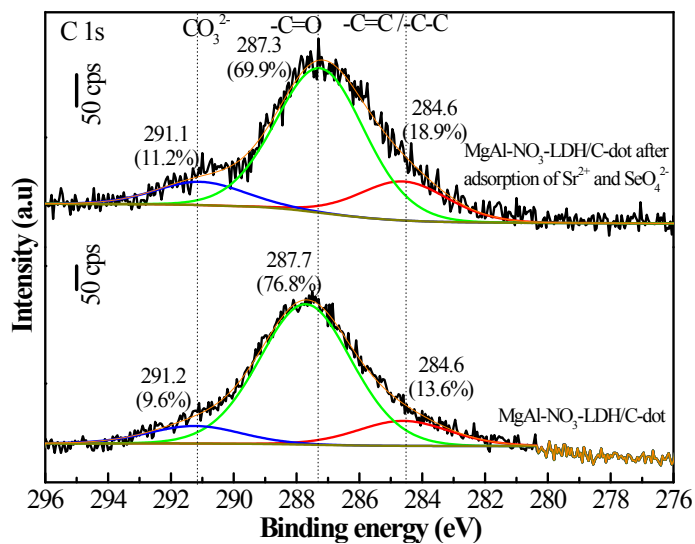

**Figure S2** XPS C 1s regions of MgAl-NO<sub>3</sub>-LDH/C-dot nanocomposites before and after adsorption of Sr<sup>2+</sup> and SeO<sub>4</sub><sup>2-</sup>.

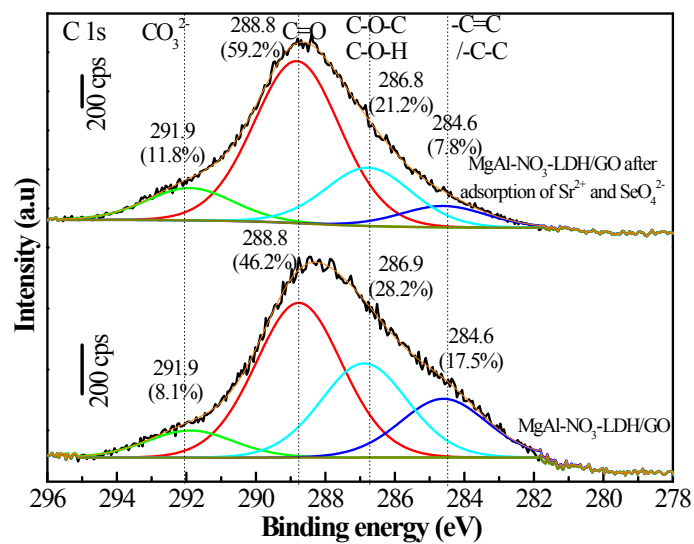

**Figure S3** XPS C 1s regions of MgAl-NO<sub>3</sub>-LDH/GO nanocomposites before and after adsorption of Sr<sup>2+</sup> and SeO<sub>4</sub><sup>2-</sup>.
